# Supplementary material for: Co-immobilised 7α- and 7β-HSDH as recyclable biocatalyst: high-performance production of TUDCA from waste chicken bile
Source: Royal Society of Chemistry journal article supplement (doi:10.1039/c8ra06798h), 2018-01-01
Supplement: c8ra06798h1.pdf [file c8ra06798h1.pdf]

## Supplementary Material

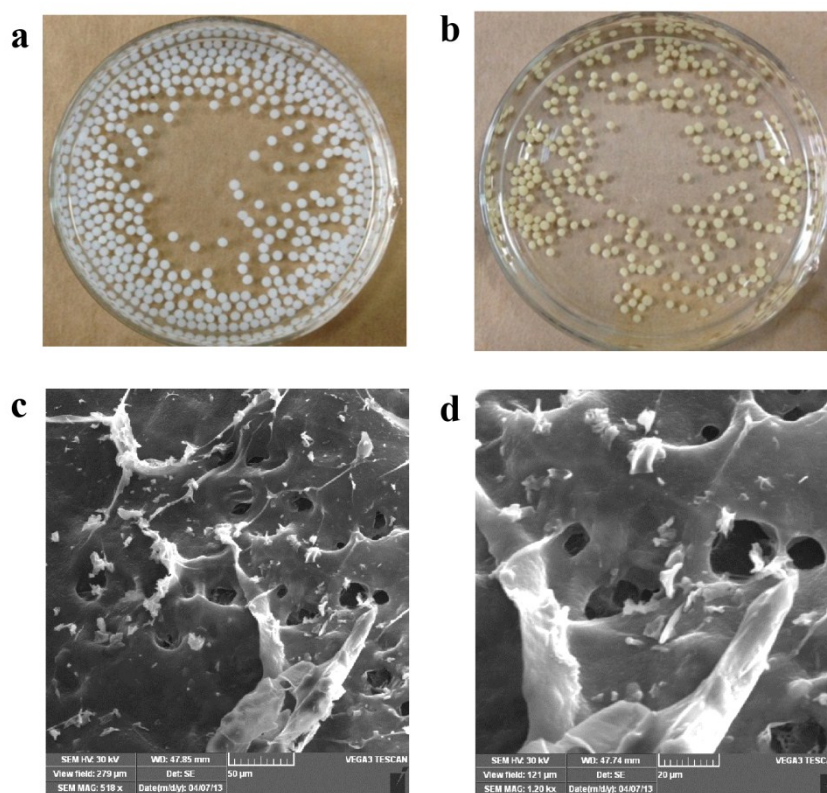

**Fig. S1** The optical photographs of chitosan microspheres, a: before being activated by glutaraldehyde, b: after being activated by glutaraldehyde; c and d were the micrographs of modified chitosan microspheres' surface detected by scanning electron microscopy (SEM).

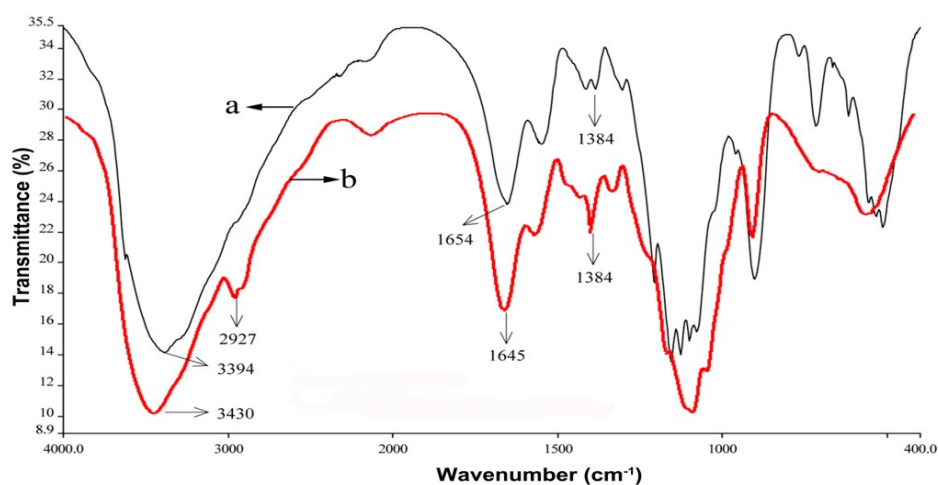

**Fig. S2** The FTIR spectra of chitosan carrier, a: natural chitosan microspheres, b: glutaraldehyde-

modified chitosan microspheres.

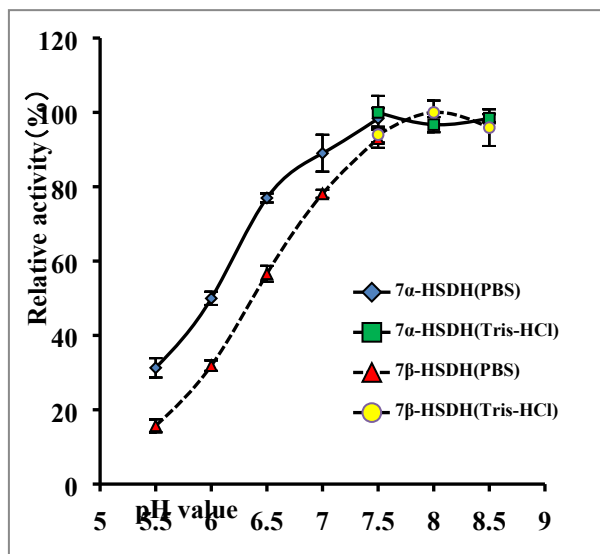

Fig. S3 The effect of pH on the immobilization process

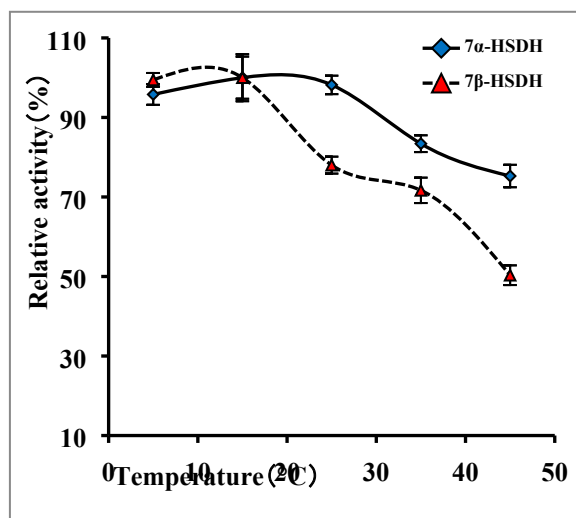

Fig. S4 The effect of temperature on the immobilization process.
